# Supplementary material
Source: PubMed Central journal article supplement (PMC1852837)

**Fig.S1**  
**A**

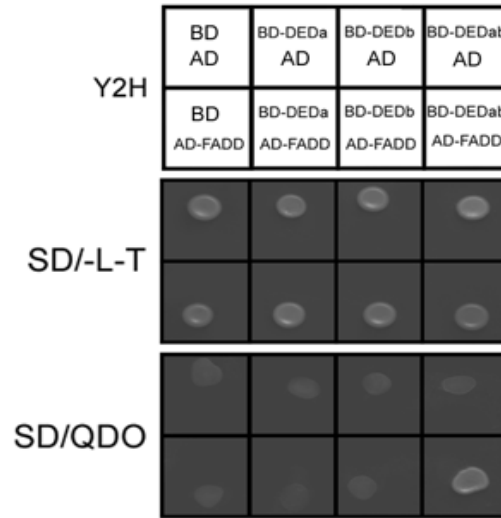

**B**

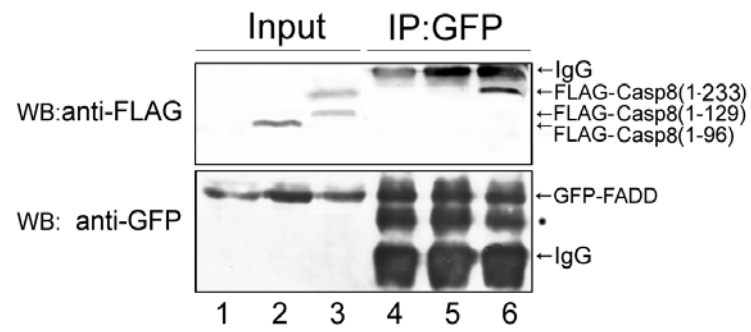

**Fig.S2**

**A**

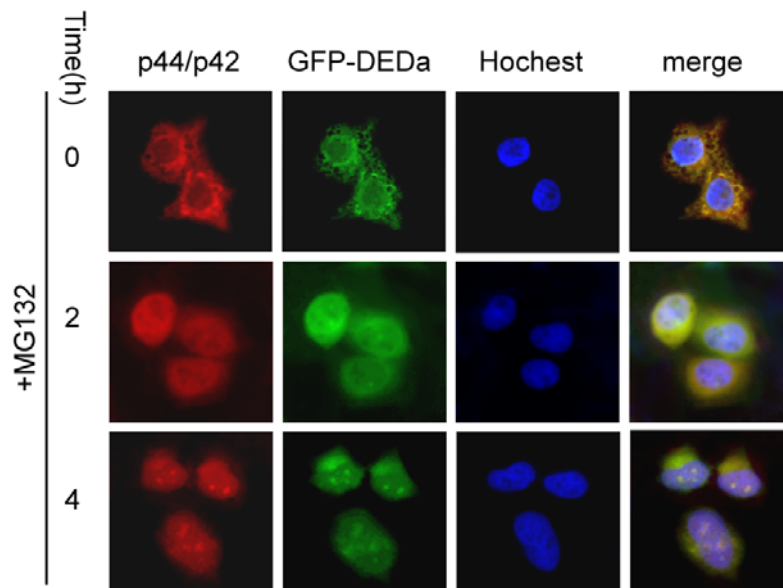

**B**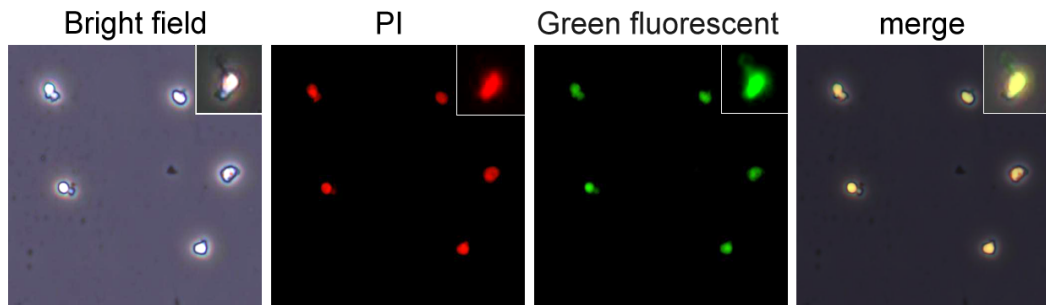**Fig.S3****A**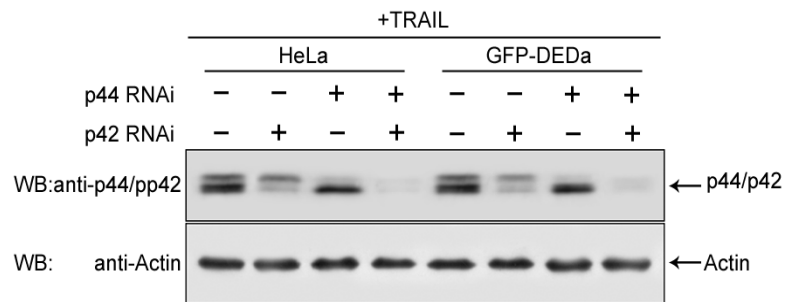**B**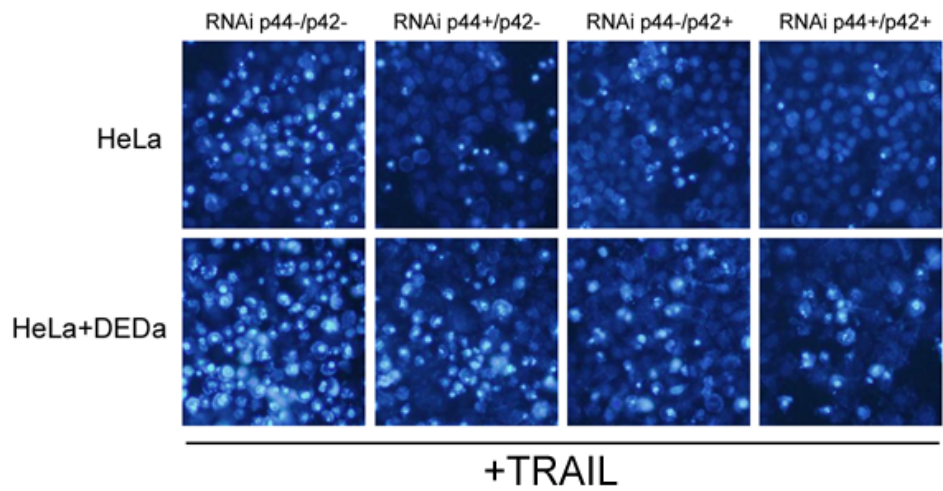

Supplement: 7601571s2.pdf [file 7601571s2.pdf]
